# Supplementary material
Source: Springer Nature journal article supplement (https://www.springermedizin.de/resource/supplementary/12969_2009_371_MOESM3_ESM.pdf/9592898)

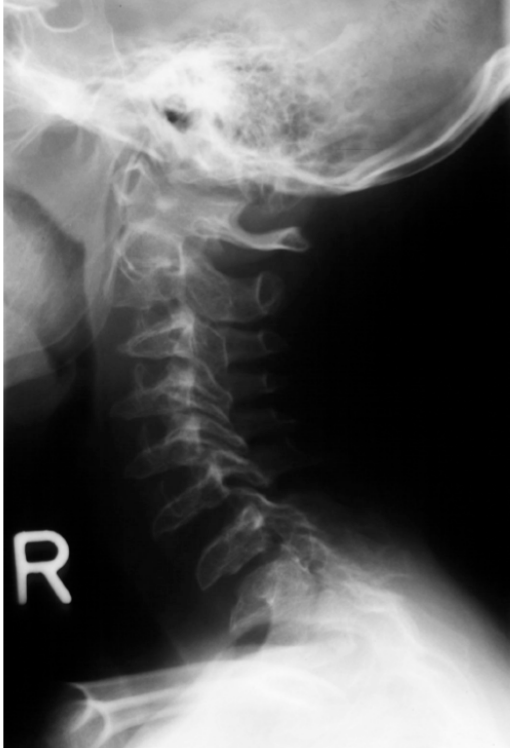

Left Panel

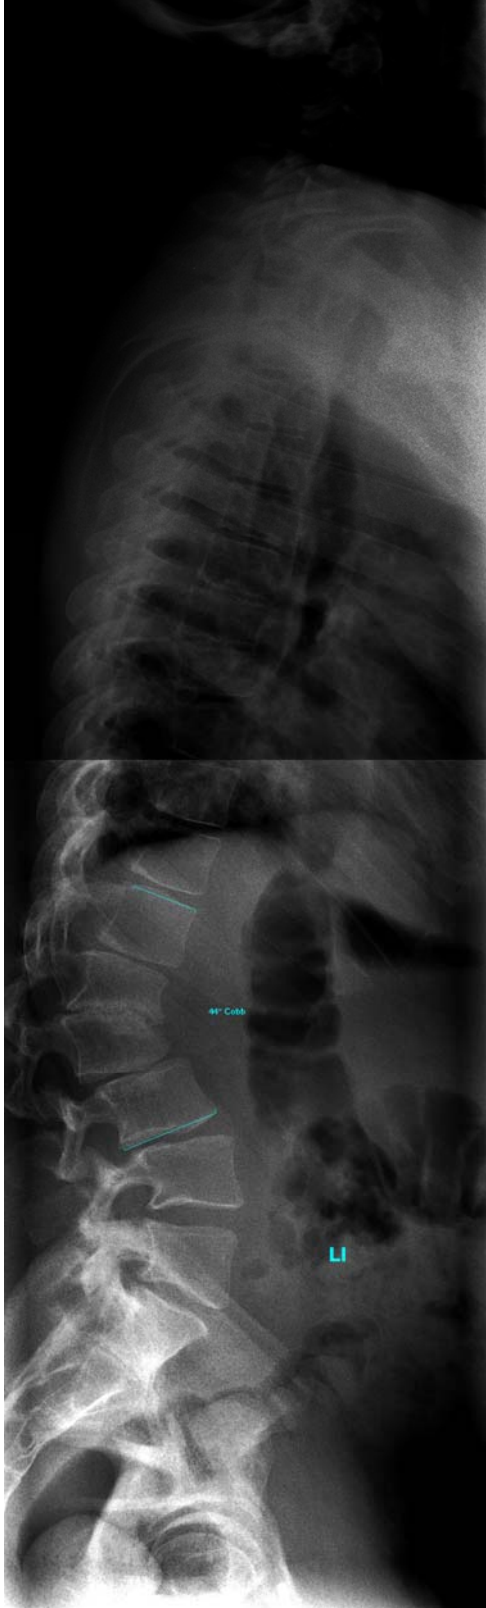

Right Panel

Supplement: MOESM3 [file 9592898]
